# Supplementary material for: Insights into life after sport for Spanish Olympians: Gender and career path perspectives
Source: PubMed Central journal article supplement (PMC6296509; doi:10.1371/journal.pone.0209433), 2018-12-17
Supplement: pone.0209433.s001.pdf [file pone.0209433.s001.pdf]

|     |       |       |              |               |              |           |                       |                       |                       |               |
|-----|-------|-------|--------------|---------------|--------------|-----------|-----------------------|-----------------------|-----------------------|---------------|
| 222 | Women | 1.949 | DC with work | 1501€ - 2000€ | Other result | Very well | I was already working | Tertiary Education    | Tertiary Education    | Professional  |
| 223 | Women | 1.963 | DC with work | 601€ - 1000€  | Other result | 4         | I was already working | Secondary Education   | Secondary Education   | Full-time job |
| 224 | Women | 1.969 | DC with work | 1501€ - 2000€ | Other result | 3         | I was already working | Secondary Education   | Tertiary Education    | #jNULO!       |
| 225 | Women | 1.962 | DC with work | 2000€ - 3000€ | Other result | #jNULO!   | #jNULO!               | Professional Training | Professional Training | Full-time job |
| 226 | Women | 1.969 | DC with work | 1001€ - 1500€ | Other result | Very bad  | More than 1 year      | Tertiary Education    | Tertiary Education    | Self-employed |
| 227 | Women | 1.963 | DC with work | 1501€ - 2000€ | Other result | 5         | I was already working | Tertiary Education    | Tertiary Education    | Professional  |
| 228 | Women | 1.975 | DC with work | 1001€ - 1500€ | Diploma      | 4         | I was already working | Secondary Education   | Secondary Education   | Temporary job |
